# Supplementary material for: Genome-wide analysis, expansion and expression of the NAC family under drought and heat stresses in bread wheat (T. aestivum L.)
Source: PLoS One. 2019 Mar 6;14(3):e0213390. doi: 10.1371/journal.pone.0213390 (PMC6402696; doi:10.1371/journal.pone.0213390)
Supplement: S4 Table — (XLSX) [file pone.0213390.s010.xlsx]

## Sheet: Genome A
Chromosome1	start1	end1	Chromosome2	start2	end2		Length (bp)
1A	343651685	343654836	2A	54099709	54096557		3152		Mean	5750.18
1A	459199047	459203076	2A	765556619	765560613		3994		Median	5255
1A	459198913	459203075	6A	532833081	532828931		4150
1A	459198910	459203076	2A	632289381	632285226		4155
1A	459198912	459203085	7A	34099374	34095237		4137
1A	459198883	459203076	2A	625952709	625948527		4182
1A	461789056	461793845	2A	558111831	558116774		4943
1A	461789395	461794459	3A	465564665	465559588		5077
1A	461795598	461800919	2A	558074670	558069298		5372
1A	471276796	471280469	6A	541216656	541212982		3674
1A	471275483	471279132	2A	557298434	557294735		3699
1A	471245097	471250023	5A	660811667	660806734		4933
1A	471275352	471281161	5A	485192481	485186683		5798
1A	471275353	471281807	2A	607848902	607855517		6615
1A	471275334	471282123	6A	30179786	30172954		6832
1A	471277181	471284023	3A	154717375	154724098		6723
1A	471275352	471282795	6A	532852210	532859803		7593
1A	471275945	471284163	3A	648298071	648289996		8075
1A	471275919	471284162	2A	557380308	557388613		8305
1A	471275353	471284162	3A	496711637	496720359		8722
2A	175451623	175454632	7A	458939024	458942034		3010
2A	175454473	175458998	7A	455419306	455414802		4504
2A	175451623	175460184	3A	496682890	496691406		8516
2A	21548608	21552200	7A	34113485	34117128		3643
2A	21548580	21552192	3A	714667299	714670965		3666
2A	21540023	21544756	3A	714658602	714663369		4767
2A	527690324	527695565	7A	171566741	171571986		5245
2A	527690273	527695565	7A	154069864	154064608		5256
2A	535224776	535227745	3A	714672254	714675273		3019
2A	535224779	535228361	3A	80453552	80457142		3590
2A	535228699	535233337	6A	1693170	1697811		4641
2A	535261252	535265997	2A	557332498	557337249		4751
2A	535228437	535233337	6A	607022912	607018025		4887
2A	535224780	535229796	7A	34513859	34508802		5057
2A	535224778	535233342	5A	556536532	556545070		8538
2A	535224776	535233337	6A	35162865	35171474		8609
2A	535224772	535233348	7A	430256875	430265386		8511
2A	54014746	54018248	5A	666572997	666569506		3491
2A	54014746	54019384	6A	1697815	1693170		4645
2A	54014750	54019646	6A	607018025	607022912		4887
2A	54014748	54022680	5A	556545067	556537170		7897
2A	54493900	54497668	2A	557338942	557342723		3781
2A	54492476	54497732	5A	502080650	502085942		5292
2A	54482325	54490377	6A	26921562	26913405		8157
2A	54482069	54490378	2A	559680862	559689149		8287
2A	54482048	54490375	3A	648314704	648323190		8486
2A	54481783	54490378	6A	541225281	541216654		8627
2A	54481788	54490375	2A	54940529	54949160		8631
2A	54858647	54861769	2A	557075855	557072722		3133
2A	54929409	54932978	6A	541223777	541220209		3568
2A	54941049	54946056	3A	586427285	586432177		4892
2A	54941140	54949165	6A	26921480	26913402		8078
2A	54941016	54949161	2A	559681082	559689147		8065
2A	54940790	54949161	3A	648314705	648323191		8486
2A	54940529	54949250	6A	541225276	541216567		8709
2A	556092555	556096670	5A	45004871	45009004		4133
2A	556092556	556097748	6A	607005747	607010943		5196
2A	556092555	556098190	3A	681767959	681773596		5637
2A	556093098	556099179	6A	30172375	30166266		6109
2A	556093090	556099962	3A	586440081	586446990		6909
2A	556093095	556101221	3A	624734436	624726281		8155
2A	556093097	556101222	7A	105795145	105786947		8198
2A	556093090	556101227	3A	586433033	586441265		8232
2A	557294735	557297925	3A	648294884	648298071		3187
2A	557294735	557298034	2A	557383524	557380231		3293
2A	557324807	557328125	2A	595204073	595200757		3316
2A	557294735	557298104	2A	607852849	607849487		3362
2A	557295019	557298429	5A	485188942	485192346		3404
2A	557325089	557328619	7A	3866698	3870202		3504
2A	557294735	557298429	6A	30175944	30179633		3689
2A	557294735	557298433	2A	559660011	559656323		3688
2A	557294735	557298433	3A	582933167	582929472		3695
2A	557338942	557342723	5A	502082084	502085877		3793
2A	557294735	557298434	6A	532856143	532852340		3803
2A	557294735	557298553	3A	154756217	154752424		3793
2A	557324543	557328619	7A	146037958	146042010		4052
2A	557383834	557387166	7A	34496494	34493162		3332
2A	557409376	557413919	7A	455414751	455419306		4555
2A	557408210	557412845	6A	1697817	1693170		4647
2A	557411746	557416800	7A	34508796	34513861		5065
2A	557380234	557385542	5A	485191947	485186692		5255
2A	557380239	557386198	2A	607849564	607855517		5953
2A	557380810	557386813	5A	666563508	666569518		6010
2A	557380250	557386512	6A	30179216	30172955		6261
2A	557380285	557387143	6A	532852903	532859764		6861
2A	557408216	557416200	7A	526138852	526146808		7956
2A	557408216	557416798	5A	556545065	556536534		8531
2A	557408216	557416798	5A	660816376	660824944		8568
2A	557408216	557416798	7A	430265372	430256883		8489
2A	557408216	557416798	3A	496691406	496682890		8516
2A	557408215	557416798	6A	35171475	35162869		8606
2A	558112172	558116774	3A	465564665	465560204		4461
2A	558080298	558085425	2A	559815078	559820245		5167
2A	559645916	559648977	3A	88862602	88859544		3058
2A	559660321	559663654	7A	34496494	34493160		3334
2A	559657652	559661348	6A	541216674	541212982		3692
2A	559656193	559662033	5A	485192482	485186692		5790
2A	559657294	559663291	5A	666563508	666569507		5999
2A	559656191	559662683	2A	607848898	607855517		6619
2A	559656195	559662999	6A	30179767	30172954		6813
2A	559658055	559664940	3A	154717375	154724098		6723
2A	559656190	559663721	6A	532852206	532859856		7650
2A	559657385	559665085	5A	680824629	680817162		7467
2A	559656816	559665079	3A	648298071	648289997		8074
2A	559680554	559689138	7A	660515065	660523699		8634
2A	559680556	559689148	2A	572610326	572601655		8671
2A	559656195	559665079	3A	154752424	154761081		8657
2A	559731828	559734871	7A	3869712	3872786		3074
2A	559752818	559756938	7A	410741629	410745772		4143
2A	559752818	559763053	7A	410731467	410741731		10264
2A	559809209	559812194	3A	624693962	624690964		2998
2A	559816650	559820250	2A	595200757	595204369		3612
2A	559804712	559810420	3A	461413395	461419047		5652
2A	559804713	559811307	3A	165075573	165068896		6677
2A	560659042	560669194	7A	146037955	146048142		10187
2A	572624810	572629530	6A	607010943	607006222		4721
2A	572601655	572610316	5A	600233112	600224490		8622
2A	572601657	572610333	7A	430245214	430253852		8638
2A	572621249	572630035	5A	437189253	437198057		8804
2A	572621257	572630034	7A	458918529	458927667		9138
2A	595200757	595204066	7A	146041516	146038223		3293
2A	595200757	595204365	7A	3869710	3866136		3574
2A	607850512	607854186	6A	541216656	541212982		3674
2A	607806701	607810645	7A	171446023	171449944		3921
2A	607850896	607855517	3A	154717375	154722013		4638
2A	607850226	607855517	5A	680824629	680819366		5263
2A	607850135	607855517	5A	666563508	666568902		5394
2A	607849664	607855517	3A	648298071	648292219		5852
2A	607849556	607855517	3A	154752927	154758885		5958
2A	607848899	607855517	6A	30179770	30173269		6501
2A	607848902	607855517	6A	611873799	611880304		6505
2A	607848876	607855517	6A	532852183	532858815		6632
2A	607806702	607814311	3A	465557046	465564665		7619
2A	607806701	607814350	5A	666677336	666669669		7667
2A	625947847	625952546	2A	765561297	765556619		4678
2A	625947867	625952688	7A	34094590	34099383		4793
2A	625947747	625952678	6A	532828150	532833081		4931
2A	625947747	625952679	2A	632284443	632289379		4936
2A	625940191	625945450	6A	532821409	532826724		5315
2A	632284541	632289246	2A	765561299	765556619		4680
2A	632284563	632289377	7A	34094590	34099372		4782
2A	667912402	667916640	3A	165071821	165076086		4265
2A	667918975	667924104	5A	141051990	141056948		4958
2A	706623231	706626390	6A	77120867	77117719		3148
2A	706659463	706667395	3A	702983127	702975126		8001
2A	765356416	765360967	2A	54124410	54119980		4430
2A	765556619	765561299	6A	532832949	532828248		4701
3A	154719639	154722988	7A	34496494	34493160		3334
3A	154720740	154724098	5A	666569506	666572854		3348
3A	154717375	154721363	5A	485190614	485186692		3922
3A	154717375	154722329	6A	30177900	30172954		4946
3A	154717375	154722633	5A	666564270	666569518		5248
3A	154718383	154724098	5A	485225098	485219403		5695
3A	154717375	154723218	6A	532854188	532860020		5832
3A	154753518	154759507	5A	666563508	666569520		6012
3A	154752549	154759201	6A	30179633	30172954		6679
3A	154717375	154724098	5A	680823959	680817307		6652
3A	154717375	154724098	3A	496713507	496720221		6714
3A	154717375	154724098	6A	607017801	607011081		6720
3A	154717375	154724098	3A	582931219	582937921		6702
3A	154752544	154759876	6A	532852340	532859815		7475
3A	154753609	154761095	5A	680824629	680817154		7475
3A	154753045	154761082	3A	648298071	648289996		8075
3A	154752545	154761084	6A	607019629	607010940		8689
3A	165072221	165077103	3A	624694538	624699409		4871
3A	165069112	165074512	5A	141011789	141006403		5386
3A	165070564	165077429	7A	512354968	512348205		6763
3A	165069529	165077100	3A	461419331	461411934		7397
3A	461380267	461383208	3A	714675273	714672256		3017
3A	461379724	461383210	5A	556540043	556536530		3513
3A	461411934	461419331	3A	165077100	165069529		7571
3A	465546559	465549664	6A	541216663	541213565		3098
3A	465546235	465549664	7A	512318472	512315069		3403
3A	465549650	465554602	7A	512310918	512315902		4984
3A	465556979	465564665	5A	666677398	666669708		7690
3A	496716861	496720360	5A	666569506	666572994		3488
3A	496711633	496718456	6A	30179771	30172954		6817
3A	496712836	496720388	5A	680824629	680817140		7489
3A	496711624	496719345	6A	532852198	532860020		7822
3A	496712241	496720369	3A	648298109	648289987		8122
3A	496712187	496720359	3A	154752954	154761081		8127
3A	496711635	496720360	6A	611873797	611882401		8604
3A	496711637	496720359	6A	607019759	607010943		8816
3A	582934951	582938059	7A	3883929	3880850		3079
3A	582930837	582934480	6A	541216655	541212982		3673
3A	582934156	582938074	5A	666575245	666579119		3874
3A	582929331	582935174	5A	485192492	485186683		5809
3A	582929337	582936135	6A	30179773	30172955		6818
3A	582929306	582938062	3A	496711601	496720362		8761
3A	582929343	582938059	6A	607019759	607010943		8816
3A	586439517	586443664	5A	45004870	45009004		4134
3A	586440077	586444743	6A	607006276	607010943		4667
3A	586440070	586445188	3A	681768482	681773596		5114
3A	586432474	586439153	6A	30172953	30166266		6687
3A	586439515	586447001	3A	624735002	624727553		7449
3A	586432465	586441271	7A	105795726	105786937		8789
3A	624690964	624693962	5A	141012858	141009869		2989
3A	624694596	624699188	7A	512353257	512348717		4540
3A	624729806	624734436	6A	607010943	607006285		4658
3A	624728353	624734512	6A	30166266	30172449		6183
3A	624726256	624735002	7A	105786923	105795721		8798
3A	627690222	627693412	7A	260053648	260050455		3193
3A	648289978	648293079	7A	3880830	3883929		3099
3A	648291244	648294574	7A	34493160	34496494		3334
3A	648293547	648297228	6A	541212982	541216656		3674
3A	648291903	648298071	6A	30172954	30179128		6174
3A	648290102	648296842	3A	154724130	154717375		6755
3A	648290999	648298077	6A	532860038	532852952		7086
3A	648289996	648297514	5A	680817167	680824629		7462
3A	648289987	648298072	6A	611882410	611874447		7963
3A	648289987	648298109	3A	496720369	496712241		8128
3A	648289996	648298071	6A	607010942	607019119		8177
3A	681768501	681773596	7A	105795144	105790060		5084
3A	681768500	681773596	6A	30172376	30167287		5089
3A	681768448	681773596	7A	458927154	458922001		5153
3A	681767945	681773154	6A	607005731	607010943		5212
3A	681768267	681773596	6A	599276453	599281792		5339
3A	681767934	681773596	5A	666547570	666541985		5585
3A	714672258	714675271	6A	35162869	35165869		3000
3A	714672258	714675271	7A	34513859	34510857		3002
3A	714672242	714675271	3A	80453537	80456518		2981
3A	714667373	714672023	7A	34113531	34118185		4654
3A	72277863	72281902	3A	465545624	465549664		4040
3A	72306857	72312886	5A	485186697	485180682		6015
3A	72306862	72316890	5A	283034657	283024671		9986
3A	80453553	80457142	7A	34513859	34510235		3624
3A	80453552	80457142	5A	556536533	556540120		3587
3A	80453533	80457142	7A	430256863	430260502		3639
3A	88829777	88834034	7A	455409909	455405651		4258
3A	88829653	88834048	7A	172215489	172219883		4394
4A	174139038	174142524	7A	458946248	458942775		3473
4A	511118589	511121819	5A	600416521	600419753		3232
4A	511108177	511114489	6A	377839330	377833108		6222
4A	521927284	521938011	7A	171452360	171463069		10709
4A	617411293	617415778	7A	105802054	105797550		4504
4A	617396433	617404652	6A	541217065	541225284		8219
4A	62279466	62284034	7A	455414734	455419306		4572
4A	62281881	62286914	7A	34508802	34513863		5061
4A	62278322	62286912	7A	430265372	430256881		8491
4A	690674475	690679700	5A	502092288	502097513		5225
4A	690674469	690681622	6A	599724740	599731894		7154
4A	690860057	690865791	5A	666569241	666563508		5733
4A	690897074	690903090	5A	666569518	666563508		6010
4A	690897403	690904215	6A	30172973	30179771		6798
4A	691236513	691239962	7A	34113504	34116955		3451
4A	691334713	691339509	6A	532828292	532833081		4789
4A	691334713	691339517	7A	34094612	34099381		4769
4A	691328014	691332937	6A	532821823	532826769		4946
5A	141045720	141050440	6A	607010943	607006221		4722
5A	141042155	141050959	5A	437189246	437198072		8826
5A	141042167	141050970	7A	458918526	458927695		9169
5A	317266187	317270552	5A	600374237	600369945		4292
5A	317259627	317266193	7A	512310927	512317487		6560
5A	437193894	437197453	5A	45009004	45005449		3555
5A	437192815	437197437	6A	607010943	607006320		4623
5A	437190615	437198056	7A	458920237	458927667		7430
5A	437189260	437198057	7A	105786947	105795718		8771
5A	45005436	45009004	6A	607006290	607009865		3575
5A	45005425	45009004	7A	458927108	458923522		3586
5A	45004870	45009004	7A	105795719	105791584		4135
5A	459012344	459015651	6A	35171555	35174831		3276
5A	485219257	485222344	7A	3880842	3883929		3087
5A	485220503	485223841	7A	34493166	34496494		3328
5A	485186692	485191374	5A	666568249	666563508		4741
5A	485186692	485192480	6A	30173923	30179767		5844
5A	485186692	485192480	6A	611879649	611873799		5850
5A	556539385	556543807	7A	455419306	455414867		4439
5A	556540461	556545065	6A	1693174	1697811		4637
5A	556540196	556545065	6A	607022912	607018025		4887
5A	556537184	556545067	7A	526146730	526138850		7880
5A	556536526	556545068	5A	660824952	660816373		8579
5A	556536534	556545065	6A	35162869	35171474		8605
5A	600249745	600253212	6A	377833109	377829614		3495
5A	600245783	600254959	7A	260044443	260053612		9169
5A	600369945	600374237	5A	317270552	317266187		4365
5A	600337855	600343444	7A	458951811	458946249		5562
5A	660816376	660821002	6A	1697811	1693170		4641
5A	660816373	660821263	6A	607018022	607022912		4890
5A	660816375	660824403	7A	526138851	526146857		8006
5A	666540984	666547002	6A	30166266	30172376		6110
5A	666563508	666569218	6A	30178661	30172954		5707
5A	666563599	666569518	5A	680824629	680818749		5880
5A	666563508	666569506	6A	607018647	607012559		6088
5A	666673400	666677679	7A	171449941	171445690		4251
5A	680824619	680828179	7A	172214363	172210861		3502
5A	680819050	680824629	6A	30172954	30178570		5616
5A	680818743	680824629	5A	666569521	666563599		5922
5A	680818370	680824629	6A	532859815	532853518		6297
5A	680817168	680824629	6A	611882400	611875009		7391
5A	680817152	680824629	6A	607010927	607018556		7629
6A	124403218	124410115	7A	166496824	166503730		6906
6A	1694714	1697811	7A	3883929	3880850		3079
6A	1693170	1697813	6A	607022650	607018023		4627
6A	1693170	1697812	6A	35166831	35171475		4644
6A	1693170	1697821	7A	430260839	430265382		4543
6A	1693170	1697823	7A	526143464	526138841		4623
6A	26913398	26921562	6A	541216648	541224742		8094
6A	30167729	30172375	6A	607010943	607006288		4655
6A	30166340	30172349	6A	599282724	599276720		6004
6A	30172944	30179769	6A	532859142	532852209		6933
6A	35168370	35171474	7A	3883929	3880850		3079
6A	35162868	35167922	7A	34513860	34508802		5058
6A	35194236	35202260	7A	526146981	526138852		8129
6A	532828270	532833080	7A	34094590	34099372		4782
6A	532852209	532859142	6A	30179769	30172944		6825
6A	532852211	532860031	6A	607019759	607011948		7811
6A	599276692	599282792	6A	30172376	30166266		6110
6A	607012388	607015535	7A	34493363	34496494		3131
6A	607006222	607010943	7A	458927165	458922443		4722
6A	607018025	607022912	7A	526138852	526143727		4875
6A	607018014	607022912	7A	430265380	430260578		4802
6A	611873797	611880339	6A	30179769	30173234		6535
7A	105788279	105795722	3A	586446973	586439514		7459
7A	154064608	154077750	7A	171571986	171558893		13093
7A	171558888	171563676	7A	64589101	64584313		4788
7A	171580883	171589514	7A	458954793	458946250		8543
7A	455405651	455414733	7A	172219869	172210863		9006

## Sheet: Genome B
Chromosome1	start1	end1	Chromosome2	start2	end2		Length (bp)
1B	496058872	496061926	2B	470456756	470459834		3078		Mean	5546.64
1B	131798077	131805477	2B	679810138	679802605		7533		Median	5146
1B	484899179	484904756	2B	679796335	679801913		5578
1B	484899179	484904756	3B	102583383	102588954		5571
1B	484899180	484904756	3B	199690112	199695696		5584
1B	131486536	131495525	3B	487925776	487917059		8717
1B	484899180	484904758	3B	487920204	487925781		5577
1B	131491452	131494828	4B	619613822	619610445		3377
1B	131487902	131495522	4B	619634711	619642318		7607
1B	484899179	484904757	4B	62985098	62979604		5494
1B	131489493	131495522	6B	688732176	688738228		6052
1B	131797812	131806443	7B	135029955	135021168		8787
1B	131798378	131806433	7B	219639390	219647617		8227
1B	131791531	131795804	7B	2802358	2806648		4290
1B	131512680	131515778	7B	436779709	436776611		3098
1B	131518586	131521923	7B	436783889	436780543		3346
1B	131513839	131521923	7B	436776613	436768521		8092
2B	504500534	504503673	2B	536596109	536599244		3135
2B	536605635	536609029	2B	568056037	568052673		3364
2B	504758333	504766985	2B	61273125	61281485		8360
2B	507418524	507427582	2B	615417715	615426806		9091
2B	793816542	793822109	2B	798978957	798973463		5494
2B	504512620	504515866	2B	82364174	82367423		3249
2B	504759023	504762475	2B	82830861	82827401		3460
2B	793778319	793781336	2B	82827401	82830437		3036
2B	679793800	679801913	3B	102580843	102588954		8111
2B	536626363	536634927	3B	199686965	199695696		8731
2B	82728949	82737438	3B	199695696	199686968		8728
2B	82728949	82732270	3B	199904360	199907711		3351
2B	470446980	470455070	3B	440512203	440504081		8122
2B	679803291	679809836	3B	440510571	440504001		6570
2B	82837310	82841043	3B	440508468	440512229		3761
2B	504758350	504766987	3B	487573586	487582187		8601
2B	793777967	793781336	3B	487578046	487574662		3384
2B	82827401	82830849	3B	487577692	487574252		3440
2B	536626365	536634925	3B	487917062	487925776		8714
2B	679793593	679801911	3B	487917460	487925776		8316
2B	82728951	82737440	3B	487925776	487917061		8715
2B	539716415	539723464	3B	583410964	583403933		7031
2B	85153975	85157569	3B	61911888	61908316		3572
2B	470446978	470455063	3B	643035383	643027290		8093
2B	82837301	82841021	3B	643031660	643035386		3726
2B	539716417	539723422	3B	658479410	658472418		6992
2B	82694705	82702662	3B	773923811	773931758		7947
2B	82701422	82709505	3B	773923658	773931758		8100
2B	85087469	85090996	3B	773920130	773923658		3528
2B	470446979	470455063	3B	820493493	820485375		8118
2B	679803291	679809836	3B	820491856	820485289		6567
2B	82837301	82841041	3B	820489743	820493514		3771
2B	82379107	82386619	3B	820748756	820756365		7609
2B	507397032	507401431	4B	109040554	109036164		4390
2B	82379107	82382250	4B	611527110	611530253		3143
2B	470459834	470462943	4B	619567102	619570217		3115
2B	504749927	504755018	4B	619592578	619597612		5034
2B	536626907	536630281	4B	619610446	619613822		3376
2B	679793880	679797249	4B	619610446	619613822		3376
2B	82733422	82737439	4B	619613792	619609670		4122
2B	489427514	489430729	4B	619667149	619670381		3232
2B	507387252	507392345	4B	619653350	619648307		5043
2B	82729596	82737440	4B	619634233	619642319		8086
2B	507396760	507405272	4B	67747503	67756000		8497
2B	793777967	793781336	5B	230444661	230448050		3389
2B	82827401	82830833	5B	230445013	230448446		3433
2B	85154142	85157569	5B	403687681	403691101		3420
2B	470446980	470455062	5B	461119991	461128041		8050
2B	83965542	83970693	5B	461119990	461114844		5146
2B	507489356	507492634	5B	535678826	535682101		3275
2B	507396762	507401291	5B	59145563	59141008		4555
2B	539690074	539695359	5B	59185271	59190533		5262
2B	489397299	489400959	5B	653414906	653411238		3668
2B	504762048	504766986	5B	702343237	702348121		4884
2B	504758926	504764902	5B	702388195	702394220		6025
2B	539689992	539693394	5B	702346557	702343237		3320
2B	82827401	82830861	6B	413924043	413927488		3445
2B	223130002	223134141	6B	515557830	515553636		4194
2B	61273142	61279271	6B	578538142	578531969		6173
2B	793777967	793781338	6B	578533657	578537031		3374
2B	82827401	82830838	6B	578534009	578537428		3419
2B	82701418	82705644	6B	64345721	64349949		4228
2B	679793834	679799208	6B	688737554	688732176		5378
2B	507744289	507748431	7B	127673832	127669689		4143
2B	470455414	470459836	7B	127755680	127760098		4418
2B	82383484	82386622	7B	128429863	128432956		3093
2B	679802605	679810138	7B	135022133	135029689		7556
2B	679833004	679839209	7B	426997651	426991451		6200
2B	489397747	489401008	7B	455253708	455250456		3252
2B	545279969	545287358	7B	455277039	455284398		7359
2B	679803298	679809836	7B	495328545	495335096		6551
2B	82694705	82698211	7B	627592449	627588964		3485
2B	504727253	504730349	7B	728307566	728310657		3091
2B	82701420	82710004	7B	728293934	728302573		8639
2B	470455068	470459590	7B	735325381	735329877		4496
2B	507209204	507217415	7B	735798943	735790849		8094
2B	539692691	539696163	7B	749581369	749584847		3478
2B	793778038	793781338	7B	87159864	87163181		3317
2B	82827401	82830790	7B	87160144	87163532		3388
3B	199692341	199696588	3B	199907716	199903470		4246
3B	487928705	487932042	3B	61912883	61909559		3324
3B	820484802	820493492	3B	643026730	643035381		8651
3B	487892678	487897540	3B	675293431	675288572		4859
3B	487897534	487903870	3B	773925398	773931758		6360
3B	643026730	643035381	3B	820484802	820493492		8690
3B	487570428	487573585	3B	820748519	820751674		3155
3B	62331602	62336529	3B	820748519	820753470		4951
3B	487897534	487904359	4B	381388990	381382156		6834
3B	487570117	487573585	4B	611526562	611530031		3469
3B	820748519	820751898	4B	611526873	611530255		3382
3B	440508046	440512204	4B	619609669	619605518		4151
3B	62329667	62335744	4B	619570448	619576554		6106
3B	820489330	820493492	4B	619609669	619605519		4150
3B	440503584	440506623	4B	663962754	663965810		3056
3B	820484846	820487908	4B	663962754	663965810		3056
3B	487573584	487582184	5B	230449139	230440501		8638
3B	773883695	773889993	5B	230440501	230446784		6283
3B	773890014	773897294	5B	230441854	230449138		7284
3B	61908303	61912579	5B	403691114	403686793		4321
3B	487897534	487901710	5B	461119008	461114844		4164
3B	62329368	62335571	5B	461154262	461160486		6224
3B	643026667	643035381	5B	461128628	461119991		8637
3B	658453802	658458970	5B	461114844	461119990		5146
3B	773924512	773929577	5B	461119893	461114844		5049
3B	820748519	820752510	5B	461156491	461160486		3995
3B	440503945	440512216	5B	476182820	476191096		8276
3B	643027137	643035385	5B	476182814	476191085		8271
3B	820485229	820493493	5B	476182824	476191082		8258
3B	487578990	487582194	5B	522384332	522387559		3227
3B	647264260	647267627	5B	535678826	535682194		3368
3B	647245093	647250137	5B	535713519	535708475		5044
3B	721499704	721509684	5B	590017580	590007574		10006
3B	773890024	773894153	5B	590020454	590024630		4176
3B	773885766	773889991	5B	702394220	702389986		4234
3B	773890740	773896605	5B	702394220	702388318		5902
3B	658467770	658474702	6B	51584123	51591077		6954
3B	487573554	487579734	6B	578538176	578531969		6207
3B	773920129	773923661	6B	578550897	578547506		3391
3B	773886159	773889993	6B	578531969	578535766		3797
3B	773891133	773896603	6B	578531969	578537424		5455
3B	773923658	773928036	6B	64345725	64350102		4377
3B	199686968	199692984	6B	688738227	688732176		6051
3B	487917062	487923079	6B	688738228	688732176		6052
3B	643047200	643056272	6B	710122686	710113625		9061
3B	583411909	583416740	7B	127635346	127630511		4835
3B	487567926	487573585	7B	128453789	128459454		5665
3B	62329385	62336529	7B	128454078	128461252		7174
3B	440503995	440512203	7B	134023605	134031813		8208
3B	643027190	643035389	7B	134023599	134031823		8224
3B	487569837	487573585	7B	410600321	410596573		3748
3B	62330993	62335748	7B	410600339	410595560		4779
3B	820748519	820752687	7B	410599730	410595560		4170
3B	773715793	773720303	7B	436807138	436811557		4419
3B	820484802	820491859	7B	465134344	465127320		7024
3B	440504000	440512203	7B	495335097	495326891		8206
3B	643027104	643035390	7B	495335200	495326882		8318
3B	820485213	820493493	7B	495335171	495326890		8281
3B	199904360	199907717	7B	728302563	728299190		3373
3B	487897603	487901488	7B	728303681	728307566		3885
3B	773924524	773929354	7B	728302767	728307566		4799
3B	487568219	487573585	7B	735320191	735325561		5370
3B	62329074	62336578	7B	735319880	735327405		7525
3B	820748519	820756116	7B	735322403	735329868		7465
3B	773889990	773896530	7B	87157010	87163503		6493
4B	109057819	109063614	4B	502429977	502424188		5789
4B	619564700	619570447	5B	423512430	423518136		5706
4B	62996708	62999810	5B	461154328	461157431		3103
4B	619605519	619609669	5B	476191081	476186925		4156
4B	109024216	109034223	5B	590007576	590017585		10009
4B	109036302	109040554	5B	59141008	59145293		4285
4B	502426134	502429900	6B	19310707	19314463		3756
4B	619636304	619642318	6B	688732176	688738228		6052
4B	619570448	619576554	7B	128454364	128460466		6102
4B	62996708	62999810	7B	128454128	128457235		3107
4B	619919311	619926452	7B	134660323	134653186		7137
4B	67777568	67784919	7B	436798906	436806054		7148
4B	663958085	663961762	7B	59154851	59158533		3682
4B	643329613	643332990	7B	628712758	628716124		3366
5B	535679426	535685014	5B	535679426	535685014		5588
5B	702389929	702394220	5B	59189994	59185677		4317
5B	590021167	590024629	5B	702394220	702390752		3468
5B	461114847	461118084	6B	19313948	19310707		3241
5B	230442972	230449139	6B	578531969	578538144		6175
5B	423514720	423518136	7B	107807136	107803687		3449
5B	423508627	423513888	7B	107813279	107808039		5240
5B	230402644	230407509	7B	127632812	127637678		4866
5B	461154280	461160464	7B	128454081	128460269		6188
5B	461119991	461128139	7B	134031813	134023599		8214
5B	476182878	476191081	7B	134023609	134031813		8204
5B	59183779	59187449	7B	134002871	133999167		3704
5B	653438653	653446089	7B	436769179	436776613		7434
5B	461154262	461162035	7B	735320173	735328110		7937
5B	589656395	589660774	7B	735795240	735790866		4374
5B	230440501	230448373	7B	87155675	87163503		7828
5B	702343236	702348120	7B	87160574	87155674		4900
6B	572522323	572528274	7B	465094260	465100035		5775
6B	578531969	578538143	7B	87158147	87164277		6130
7B	59166950	59171708	7B	107846693	107841880		4813
7B	410595560	410600339	7B	128460470	128455686		4784
7B	134023611	134031813	7B	219639402	219647607		8205
7B	128455703	128460470	7B	410600322	410595560		4762
7B	134023599	134030179	7B	465133875	465127311		6564
7B	135022616	135029554	7B	465127099	465134024		6925
7B	219639399	219646184	7B	465133865	465127099		6766
7B	134023610	134031821	7B	495335097	495326882		8215
7B	628712758	628716124	7B	728310922	728307566		3356
7B	628719569	628723463	7B	728311455	728307564		3891
7B	127755680	127759862	7B	735325727	735329887		4160
7B	133988377	133993828	7B	735793506	735798931		5425
7B	735304598	735312501	7B	735810869	735802666		8203

## Sheet: Genome D
Chromosome1	start1	end1	Chromosome2	start2	end2		Length (bp)
1D	270246009	270251488	1D	359649889	359644546		5343		Mean	5639.47
1D	270206083	270209171	1D	359684684	359687796		3112		median	5332.5
1D	270206083	270209162	2D	427598798	427601868		3070
1D	270239518	270245715	2D	52664436	52658230		6206
1D	270247776	270251548	2D	52657922	52654148		3774
1D	270239494	270245715	2D	639865219	639871447		6228
1D	270206083	270209173	3D	136765075	136768175		3100
1D	270206083	270209161	3D	341691400	341694503		3103
1D	270206083	270209164	3D	373858509	373855419		3090
1D	270206083	270209161	3D	442066894	442063808		3086
1D	270206083	270209161	4D	305119308	305122406		3098
1D	270206083	270209169	4D	69669316	69672396		3080
1D	270247277	270251562	4D	77066078	77061792		4286
1D	270206083	270209171	5D	431761163	431758067		3096
1D	270206083	270209172	5D	481443819	481446880		3061
1D	270206083	270209169	6D	465231024	465234126		3102
1D	270239540	270246008	7D	215088758	215082302		6456
1D	270246009	270251097	7D	227828	222870		4958
1D	270206083	270209164	7D	234521	237580		3059
1D	355683490	355692230	2D	417534633	417525909		8724
1D	355683484	355690704	2D	427759797	427766997		7200
1D	355683486	355687142	2D	52671679	52668024		3655
1D	355683483	355688699	4D	77060028	77054812		5216
1D	355684619	355692227	7D	17409371	17401693		7678
1D	355684471	355690496	7D	228873	222870		6003
1D	359643214	359651255	2D	417525912	417533978		8066
1D	359679014	359687786	2D	427593143	427601867		8724
1D	359644728	359651255	2D	427766997	427760463		6534
1D	359679016	359687787	2D	429935927	429944629		8702
1D	359643204	359650310	2D	455531664	455538740		7076
1D	359643211	359648271	2D	52652863	52657922		5059
1D	359648263	359651267	2D	52668024	52671033		3009
1D	359645131	359651255	2D	52935262	52941380		6118
1D	359647950	359651255	2D	53639581	53642870		3289
1D	359645496	359651248	2D	54476454	54482183		5729
1D	359678986	359687786	3D	136759410	136768163		8753
1D	359679016	359687786	3D	341685732	341694503		8771
1D	359679010	359687786	3D	373864170	373855422		8748
1D	359679016	359687786	3D	442072586	442063808		8778
1D	359678953	359687029	3D	484644720	484652772		8052
1D	359643214	359651267	3D	512711100	512719140		8040
1D	359678998	359686380	3D	520619995	520627359		7364
1D	359680472	359686749	3D	520634176	520627906		6270
1D	359682076	359687787	4D	305116700	305122407		5707
1D	359679006	359687798	4D	69663651	69672399		8748
1D	359643179	359648983	4D	77060469	77066296		5827
1D	359646710	359651248	4D	77054812	77059356		4544
1D	359683314	359686559	5D	238096994	238093749		3245
1D	359681390	359687786	5D	384321433	384327790		6357
1D	359679505	359688954	5D	431766341	431756911		9430
1D	359684021	359687796	5D	481443156	481446879		3723
1D	359647404	359650398	6D	453209078	453206159		2919
1D	359679512	359687787	6D	465225853	465234119		8266
1D	359679010	359687805	7D	228866	237596		8730
1D	359679004	359687786	7D	382261077	382269814		8737
1D	359684821	359687786	7D	398705695	398708667		2972
1D	359643214	359651129	7D	571499475	571507395		7920
1D	362295829	362302469	2D	429816870	429823543		6673
1D	371594386	371599907	2D	427601886	427596647		5239
1D	371594397	371599907	3D	373855414	373860658		5244
1D	371594405	371599907	3D	442063808	442069045		5237
1D	371594405	371599907	4D	305122406	305117154		5252
1D	371594387	371599907	4D	69672404	69667166		5238
1D	371594398	371599907	5D	431758070	431763317		5247
1D	371594405	371599907	6D	465234118	465228873		5245
1D	371594405	371599907	7D	237577	232370		5207
1D	371594405	371599907	7D	382269814	382264591		5223
1D	80007528	80010844	3D	136783053	136786369		3316
1D	80007527	80010744	5D	126243697	126246919		3222
1D	80007522	80010680	5D	396348435	396345263		3172
1D	80007529	80010691	7D	447770215	447773389		3174
2D	175338403	175342536	3D	374226811	374230939		4128
2D	175310692	175314587	3D	445058249	445062161		3912
2D	175317113	175324697	4D	304674950	304682583		7633
2D	175349371	175356983	4D	304666324	304673943		7619
2D	175338403	175342495	5D	440360313	440356184		4129
2D	175352318	175357076	7D	169523040	169518277		4763
2D	175314219	175320404	7D	60260884	60254895		5989
2D	175349920	175357038	7D	627339728	627332638		7090
2D	25314923	25318597	2D	429849106	429845430		3676
2D	25314923	25318603	3D	570178504	570174852		3652
2D	25314923	25318603	5D	481436800	481440420		3620
2D	36210266	36213298	2D	487066558	487069582		3024
2D	36187461	36194629	3D	63222782	63229936		7154
2D	36210266	36213298	7D	34057776	34060819		3043
2D	398098337	398105730	2D	429851752	429859091		7339
2D	398102907	398106750	2D	429855294	429859102		3808
2D	398104383	398107836	2D	429855261	429858695		3434
2D	398103899	398107333	2D	429855279	429858695		3416
2D	398105427	398108742	2D	429855294	429858594		3300
2D	398079806	398084779	3D	148231335	148236305		4970
2D	398079806	398084778	3D	39033552	39038523		4971
2D	398079789	398084780	7D	126716223	126721209		4986
2D	417525902	417530988	2D	52652856	52657922		5066
2D	417519503	417525923	4D	77054798	77048277		6521
2D	417525912	417531702	4D	77060506	77066296		5790
2D	417529423	417534636	4D	77054812	77060023		5211
2D	417525912	417533917	5D	238056880	238048908		7972
2D	417525912	417533508	7D	17401693	17409371		7678
2D	417527647	417533656	7D	222870	228873		6003
2D	417525912	417529055	7D	480807194	480804047		3147
2D	417525895	417533851	7D	571499458	571507395		7937
2D	427601856	427605974	2D	429713974	429709855		4119
2D	427593145	427601867	3D	341685732	341694503		8771
2D	427593145	427601882	3D	442072586	442063792		8794
2D	427593143	427601111	3D	484644781	484652772		7991
2D	427593144	427600855	3D	520620012	520627730		7718
2D	427594586	427600736	3D	520634176	520628015		6161
2D	427596190	427601872	4D	305116700	305122411		5711
2D	427593145	427601868	4D	69663661	69672389		8728
2D	427597431	427600691	5D	238096994	238093705		3289
2D	427635056	427638509	5D	381040862	381044309		3447
2D	427595504	427601867	5D	384321433	384327790		6357
2D	427593629	427601867	5D	431766333	431758077		8256
2D	427598134	427601883	5D	481443155	481446885		3730
2D	427601856	427605237	6D	387714215	387717596		3381
2D	427601856	427605975	6D	453357556	453361665		4109
2D	427593624	427601874	6D	465225851	465234125		8274
2D	427593142	427601885	7D	228869	237595		8726
2D	427601876	427605974	7D	34124942	34128992		4050
2D	427593144	427601867	7D	382261088	382269814		8726
2D	427601870	427605974	7D	412778703	412774587		4116
2D	427601868	427605982	7D	60294610	60298728		4118
2D	427759799	427766997	2D	417534636	417527440		7196
2D	427759798	427763460	2D	52671678	52668024		3654
2D	427763452	427766997	2D	52657922	52654385		3537
2D	427759799	427766997	3D	512719789	512712625		7164
2D	427759798	427765017	4D	77060024	77054812		5212
2D	427762738	427766997	4D	77066296	77062047		4249
2D	427760523	427766997	5D	238048908	238055384		6476
2D	427775274	427779079	7D	168597590	168593789		3801
2D	427760932	427766997	7D	17409371	17403220		6151
2D	427760784	427766789	7D	228873	222870		6003
2D	427760589	427766997	7D	571507395	571501002		6393
2D	429666324	429672349	2D	429908163	429914032		5869
2D	429666324	429673409	2D	483186677	483179798		6879
2D	429712309	429715663	3D	497834233	497837564		3331
2D	429710745	429715844	5D	215269181	215264104		5077
2D	429666324	429673288	5D	519296469	519303341		6872
2D	429669528	429673410	5D	519265429	519269296		3867
2D	429710899	429714161	5D	519294805	519291545		3260
2D	429666331	429673411	6D	394810452	394817307		6855
2D	429669331	429673410	7D	34124943	34128993		4050
2D	429847363	429851753	3D	445047671	445052090		4419
2D	429935923	429944651	3D	341685728	341694527		8799
2D	429935927	429944628	3D	373864164	373855422		8742
2D	429939812	429944628	3D	39347238	39342409		4829
2D	429935927	429944628	3D	442072586	442063808		8778
2D	429935927	429943873	3D	484644783	484652772		7989
2D	429936440	429944628	3D	497838085	497846294		8209
2D	429935838	429943617	3D	520619925	520627730		7805
2D	429937372	429943498	3D	520634176	520628015		6161
2D	429938975	429944629	4D	305116700	305122407		5707
2D	429938289	429944628	5D	384321433	384327790		6357
2D	429907758	429914032	5D	396395745	396389728		6017
2D	429940919	429944628	5D	481443155	481446869		3714
2D	429906497	429914032	5D	519294785	519302411		7626
2D	429910578	429914032	5D	519291330	519294775		3445
2D	429906504	429914032	6D	394808766	394816257		7491
2D	429906504	429914032	6D	453353097	453360599		7502
2D	429935927	429944629	6D	465225195	465234119		8924
2D	429935926	429944628	7D	228871	237577		8706
2D	429911002	429914032	7D	34124943	34127929		2986
2D	429908167	429914032	7D	412781460	412775671		5789
2D	429906503	429909696	7D	471579298	471582490		3192
2D	455533561	455538734	2D	52935262	52940436		5174
2D	455533925	455538740	2D	54476454	54481237		4783
2D	455533371	455538740	7D	222870	228247		5377
2D	455531674	455538740	7D	571499475	571506574		7099
2D	466696593	466699870	7D	471574979	471571699		3280
2D	483180847	483188305	2D	429914032	429906505		7527
2D	483181489	483187104	3D	512687854	512682337		5517
2D	483179798	483187083	5D	396388676	396395745		7069
2D	483179798	483183670	5D	519269295	519265429		3866
2D	483179918	483188314	5D	519303341	519294784		8557
2D	483179797	483188305	6D	453361665	453353098		8567
2D	483180640	483186673	7D	412775464	412781460		5996
2D	483185143	483188305	7D	471582490	471579300		3190
2D	487030832	487035935	4D	46273865	46268758		5107
2D	487066512	487070075	7D	34449613	34453177		3564
2D	52657919	52664434	2D	639871758	639865244		6514
2D	52652866	52657922	3D	512711100	512716138		5038
2D	52652865	52656362	4D	77043451	77046916		3465
2D	52658017	52663087	5D	481316330	481311255		5075
2D	52657919	52664203	7D	126699747	126693444		6303
2D	52657919	52667870	7D	168551218	168561165		9947
2D	52658230	52667750	7D	215082593	215092161		9568
2D	52654588	52657922	7D	222871	226205		3334
2D	52652866	52657922	7D	571499475	571504545		5070
2D	52860813	52865301	2D	639756427	639760949		4522
2D	52938076	52942033	2D	53639581	53643553		3972
2D	52935628	52942025	2D	54476454	54482851		6397
2D	52935262	52938457	7D	447779864	447783033		3169
2D	53639581	53643560	2D	54478872	54482865		3993
2D	53670995	53674471	6D	60464418	60467908		3490
2D	54306621	54310789	3D	374226551	374230697		4146
2D	54476454	54482086	5D	238054619	238048951		5668
2D	54476454	54481870	7D	223426	228873		5447
2D	566819801	566822799	2D	639812086	639809082		3004
2D	566819877	566823003	7D	152926291	152923168		3123
2D	566854871	566858862	7D	168979773	168983754		3981
2D	568811298	568815165	3D	609652200	609648346		3854
2D	568807911	568815446	7D	168979775	168987163		7388
2D	639809084	639812378	5D	215266769	215263470		3299
2D	639865223	639871758	7D	168557714	168551218		6496
2D	639865231	639871762	7D	215088791	215082297		6494
3D	136763304	136768166	3D	39347238	39342406		4832
3D	136759437	136767407	3D	484644783	484652772		7989
3D	136759949	136768169	3D	497838085	497846301		8216
3D	136759437	136767151	3D	520620013	520627730		7717
3D	136760882	136767127	3D	520634176	520627906		6270
3D	136762487	136768163	4D	305116700	305122406		5706
3D	136763708	136766985	5D	238096994	238093712		3282
3D	136761801	136768164	5D	384321433	384327791		6358
3D	136783053	136786207	5D	396348429	396345263		3166
3D	136759921	136768163	5D	431766335	431758077		8258
3D	136764411	136768183	5D	481443155	481446889		3734
3D	136759437	136768163	6D	465225195	465234118		8923
3D	136759437	136768163	7D	228872	237577		8705
3D	136783054	136786247	7D	447770215	447773418		3203
3D	148231335	148236304	3D	39033552	39038523		4971
3D	169467094	169470299	5D	347465242	347468446		3204
3D	169460337	169464136	6D	387659188	387655354		3834
3D	341685732	341694504	3D	442072586	442063807		8779
3D	341685727	341693108	3D	520620008	520627369		7361
3D	341687188	341693467	3D	520634176	520627906		6270
3D	341685707	341694507	4D	69663634	69672392		8758
3D	341686224	341694503	5D	431766340	431758077		8263
3D	341690736	341694503	5D	481443155	481446869		3714
3D	341686229	341694503	6D	465225853	465234118		8265
3D	341685732	341694503	7D	228872	237577		8705
3D	341685732	341694504	7D	382261089	382269815		8726
3D	373855421	373864165	3D	341694504	341685731		8773
3D	373855421	373860279	3D	39342408	39347238		4830
3D	373856178	373864164	3D	484652772	484644783		7989
3D	373855419	373863655	3D	497846297	497838081		8216
3D	373856458	373862719	3D	520627906	520634176		6270
3D	373856434	373864181	3D	520627730	520619996		7734
3D	373855422	373861115	4D	305122406	305116700		5706
3D	373855420	373861801	5D	384327792	384321433		6359
3D	373855418	373859172	5D	481446873	481443155		3718
3D	373855422	373864164	6D	465234118	465225195		8923
3D	373820946	373828063	7D	215113435	215106288		7147
3D	374226551	374230898	5D	440360569	440356182		4387
3D	39033515	39038530	7D	126716203	126721214		5011
3D	39342408	39347238	3D	497846295	497841405		4890
3D	39343764	39347238	3D	520627382	520623895		3487
3D	39342409	39346131	5D	481446869	481443155		3714
3D	442063807	442072586	3D	341694504	341685732		8772
3D	442064563	442072586	3D	484652772	484644783		7989
3D	442064819	442072611	3D	520627730	520619989		7741
3D	442064843	442071105	3D	520627906	520634176		6270
3D	442063804	442069502	4D	305122410	305116700		5710
3D	442063808	442072587	4D	69672388	69663660		8728
3D	442063807	442070188	5D	384327791	384321433		6358
3D	445047672	445051861	3D	570176785	570180967		4182
3D	484644783	484652772	3D	373864164	373856178		7986
3D	484644783	484652516	3D	520620013	520627730		7717
3D	484646227	484652492	3D	520634176	520627906		6270
3D	484647831	484652772	4D	305116700	305121650		4950
3D	484647145	484652772	5D	384321433	384327035		5602
3D	484635186	484639695	5D	396391239	396395745		4506
3D	484645268	484652772	5D	431766333	431758834		7499
3D	484649775	484652772	5D	481443155	481446113		2958
3D	484645263	484652772	6D	465225851	465233362		7511
3D	484635508	484638646	7D	152923168	152926291		3123
3D	484637855	484641004	7D	480804047	480807196		3149
3D	497838015	497846297	3D	373863726	373855419		8307
3D	497838097	497844624	3D	520620535	520627131		6596
3D	497838980	497845040	3D	520634176	520628095		6081
3D	497848484	497857132	5D	347459868	347451237		8631
3D	497834556	497837564	5D	396391239	396394249		3010
3D	497842512	497846309	5D	481443155	481446884		3729
3D	497848482	497857132	5D	56441104	56432411		8693
3D	497838085	497846294	6D	465225882	465234118		8236
3D	497853132	497856435	7D	34421737	34424984		3247
3D	512711100	512719067	5D	238056880	238048908		7972
3D	512682501	512687854	6D	387711193	387716620		5427
3D	512681642	512687854	6D	453353677	453359962		6285
3D	512711091	512718659	7D	17401684	17409371		7687
3D	512682765	512687854	7D	412781460	412776314		5146
3D	512711091	512719001	7D	571499466	571507395		7929
3D	515783564	515792144	4D	404650283	404641220		9063
3D	515783566	515791574	4D	76622122	76614084		8038
3D	515788671	515792143	5D	238085133	238081651		3482
3D	515786581	515791574	6D	109920593	109915687		4906
3D	515779580	515783570	6D	109904784	109908843		4059
3D	515783570	515791575	6D	266427952	266419905		8047
3D	515779579	515783570	6D	27801490	27805473		3983
3D	515783570	515791573	7D	101820053	101811998		8055
3D	515793728	515796767	7D	169010878	169007760		3118
3D	515779681	515783570	7D	169016998	169013042		3956
3D	515783570	515788524	7D	215076638	215071595		5043
3D	515779644	515783570	7D	263236	267248		4012
3D	520619996	520627730	3D	373864181	373856434		7747
3D	520627906	520634176	3D	442064843	442071105		6262
3D	520623061	520627730	4D	305116700	305121394		4694
3D	520620013	520627730	4D	69663661	69671375		7714
3D	520628015	520634176	4D	69671256	69665105		6151
3D	520628052	520631334	5D	238093714	238096994		3280
3D	520622375	520627730	5D	384321433	384326779		5346
3D	520627906	520633258	5D	384326755	384321433		5322
3D	520620498	520627377	5D	431766333	431759464		6869
3D	520627906	520634176	5D	431759114	431765375		6261
3D	520620013	520627389	6D	465225195	465232753		7558
3D	520627906	520634176	6D	465233082	465226811		6271
3D	520630598	520634176	7D	164736979	164740560		3581
3D	520620005	520625035	7D	164742025	164736975		5050
3D	520619989	520627380	7D	228848	236222		7374
3D	520627921	520634176	7D	236537	230308		6229
3D	520620005	520627730	7D	382261081	382268802		7721
3D	520627906	520634176	7D	382268778	382262529		6249
3D	609635696	609638902	7D	34171063	34174252		3189
3D	609648084	609651270	7D	571458353	571461533		3180
4D	111916125	111920844	7D	152944652	152939963		4689
4D	304675050	304678266	7D	60258111	60254895		3216
4D	305116700	305122406	4D	69666709	69672388		5679
4D	305116700	305122406	5D	384322119	384327790		5671
4D	305116700	305122409	6D	465228416	465234121		5705
4D	305116700	305122406	7D	231913	237577		5664
4D	305116700	305122421	7D	382264134	382269828		5694
4D	404641779	404648377	4D	76614084	76620657		6573
4D	404641221	404644683	5D	238081651	238085133		3482
4D	404641780	404648377	7D	101811998	101818599		6601
4D	404641607	404648377	7D	169523450	169530241		6791
4D	404644826	404648365	7D	215071595	215075166		3571
4D	404641779	404648377	7D	34013910	34020459		6549
4D	404641222	404650277	7D	398700085	398708667		8582
4D	404641752	404648349	7D	60269004	60262365		6639
4D	46282671	46286839	5D	215264965	215269181		4216
4D	481899959	481907821	5D	347459879	347451957		7922
4D	481904641	481907901	7D	34421761	34425042		3281
4D	69668652	69672396	5D	481443155	481446877		3722
4D	69663661	69672388	7D	382261089	382269814		8725
4D	76614044	76619264	5D	481316885	481322092		5207
4D	76613442	76622118	6D	266419269	266427952		8683
4D	76613415	76622135	7D	101811351	101820070		8719
4D	76613442	76622120	7D	34020131	34028535		8404
4D	76614084	76622126	7D	398700658	398708676		8018
4D	77054812	77059292	5D	238053405	238048918		4487
4D	77054812	77058894	7D	17405237	17409371		4134
4D	77054812	77059042	7D	224640	228873		4233
4D	77062256	77066296	7D	222870	226918		4048
4D	77050210	77054201	7D	480841121	480837118		4003
4D	77060490	77063648	7D	480807210	480804048		3162
4D	77054812	77059236	7D	571502981	571507395		4414
4D	77043447	77046916	7D	571499470	571502986		3516
5D	126243699	126246890	7D	447770215	447773414		3199
5D	215266167	215269176	5D	519265429	519268429		3000
5D	215264554	215269181	5D	56478888	56474253		4635
5D	215261523	215269181	6D	387709780	387717447		7667
5D	215263841	215266976	7D	152926291	152923168		3123
5D	215265972	215269181	7D	34124942	34128112		3170
5D	215263200	215269181	7D	412781460	412775488		5972
5D	238093712	238096994	6D	465232938	465229657		3281
5D	384323360	384326565	5D	238096994	238093750		3244
5D	384321433	384327790	5D	431764457	431758077		6380
5D	384354797	384361942	7D	162995463	162988316		7147
5D	384321433	384327791	7D	382263448	382269815		6367
5D	384321433	384324644	7D	398727632	398730859		3227
5D	396348429	396355047	5D	440392931	440386344		6587
5D	396388676	396392369	5D	519269295	519265429		3866
5D	396388676	396395745	6D	394817305	394810041		7264
5D	396345275	396348428	7D	447773366	447770215		3151
5D	431758067	431761827	5D	481446879	481443155		3724
5D	431758076	431766333	6D	465234119	465225856		8263
5D	431758058	431766333	7D	237596	229363		8233
5D	431758077	431766333	7D	382269814	382261572		8242
5D	481196005	481200396	6D	387742414	387746802		4388
5D	481196005	481200426	7D	420725683	420721286		4397
5D	481316876	481322092	6D	266419861	266425110		5249
5D	481311254	481315906	7D	168556341	168551696		4645
5D	481311255	481316117	7D	215087431	215082593		4838
5D	481316860	481320249	7D	34425151	34421737		3414
5D	481443155	481446893	7D	233857	237603		3746
5D	519256506	519264407	6D	310862711	310870634		7923
5D	519294793	519303341	6D	394808767	394817185		8418
5D	519265429	519269295	6D	394813424	394817305		3881
5D	519291619	519294805	6D	453357442	453360628		3186
5D	519265429	519269296	7D	34125137	34128993		3856
5D	519265429	519269295	7D	412778502	412774587		3915
5D	519294793	519297972	7D	471579300	471582490		3190
5D	519294790	519297913	7D	480807197	480804047		3150
5D	56475631	56478889	7D	471574970	471571707		3263
6D	109915029	109920593	6D	266419251	266424875		5624
6D	109904673	109909479	6D	27801379	27806110		4731
6D	109915047	109920593	7D	169523041	169528614		5573
6D	109904848	109909852	7D	263236	268269		5033
6D	109915047	109920593	7D	34013264	34018838		5574
6D	109915687	109920593	7D	398700658	398705645		4987
6D	109915043	109920593	7D	60269616	60263964		5652
6D	266422903	266427952	7D	215071595	215076638		5043
6D	27801592	27806110	7D	169016998	169012408		4590
6D	27807851	27812248	7D	33777121	33781477		4356
6D	27806951	27812248	7D	631914012	631919107		5095
6D	387663166	387667391	7D	162960294	162964494		4200
6D	387698295	387705029	7D	152960352	152953580		6772
6D	387700617	387705029	7D	152930394	152934793		4399
6D	387742413	387746802	7D	420725684	420721316		4368
6D	394808765	394817317	6D	453353096	453361676		8580
6D	394808762	394811890	7D	480807199	480804047		3152
6D	453353086	453356310	7D	471579288	471582490		3202
6D	465225195	465234132	7D	228872	237591		8719
6D	465225195	465234118	7D	382261089	382269814		8725
6D	465225850	465230959	7D	398725778	398730859		5081
7D	101815000	101820063	7D	215071595	215076648		5053
7D	101811998	101820063	7D	398700659	398708677		8018
7D	101811377	101820053	7D	60269613	60260885		8728
7D	152923168	152926288	7D	471574130	471570999		3131
7D	168551195	168555787	7D	126704387	126699748		4639
7D	168551696	168557745	7D	215082804	215088827		6023
7D	169012024	169016998	7D	268269	263273		4996
7D	168979773	168986698	7D	401088519	401081651		6868
7D	169005106	169009721	7D	631919063	631914525		4538
7D	169523031	169529911	7D	34020121	34026988		6867
7D	17403429	17409371	7D	222870	228725		5855
7D	215071595	215076638	7D	34016892	34021919		5027
7D	215071595	215076653	7D	60265933	60260869		5064
7D	228871	237577	7D	382261088	382269814		8726
7D	33777121	33780422	7D	34434952	34438261		3309
7D	33777257	33781577	7D	631914828	631919205		4377
7D	34013910	34021919	7D	398700658	398708667		8009
7D	34124942	34128992	7D	60294618	60298720		4102
7D	34425729	34428963	7D	60264119	60260876		3243
7D	34435088	34438261	7D	631914828	631918038		3210
7D	398700630	398708672	7D	60269004	60260880		8124
7D	412774568	412778696	7D	34129008	34124943		4065
7D	471579300	471582431	7D	480807194	480804047		3147
