# Supplementary material for: Genome-wide analysis, expansion and expression of the NAC family under drought and heat stresses in bread wheat (T. aestivum L.)
Source: PLoS One. 2019 Mar 6;14(3):e0213390. doi: 10.1371/journal.pone.0213390 (PMC6402696; doi:10.1371/journal.pone.0213390)
Supplement: S5 Table — (XLSX) [file pone.0213390.s011.xlsx]

## Sheet: S5_Table
Chromosome1	start1	end1	Chromosome2	start2	end2	% identity	Length (bp)
chr4B	1	2061	chr5A	149937	147908	84.69	2077
chr5A	37249	39312	chr5A	62978	65045	87.49	2086
chr5A	158530	160641	chr4B	212756	214845	83.62	2130
chr5A	174985	176989	chr4B	301448	303560	80.51	2134
chr5A	37251	39368	chr5A	117123	119259	87.08	2152
chr5A	133806	135942	chr5A	39378	37247	86.36	2156
chr5A	15465	17575	chr4B	150010	147881	88.48	2161
chr5A	37250	39378	chr4B	78532	76382	84.7	2163
chr5A	7804	9918	chr4B	105538	103388	88.98	2169
chr5A	7796	9918	chr4B	150020	147881	88.36	2173
chr4B	61088	63249	chr4B	71970	69801	91.79	2181
chr5A	140232	142330	chr4B	61088	63249	85.75	2183
chr4B	181494	183650	chr4B	63249	61088	86.55	2186
chr4B	61088	63250	chr4B	54699	52541	84.31	2192
chr5A	77525	79689	chr4B	61088	63256	85.82	2193
chr4B	147847	150010	chr5A	17609	15465	88.07	2196
chr4B	103354	105538	chr5A	9952	7804	88.52	2204
chr4B	147847	150020	chr5A	9952	7796	87.95	2208
chr5A	71421	73602	chr4B	61088	63282	83.84	2222
chr5A	67812	70093	chr5A	75820	78078	88.87	2292
chr4B	212938	215245	chr4B	235678	237972	91.52	2322
chr4B	63251	65571	chr5A	50447	48121	81.39	2327
chr5A	43360	45764	chr5A	50697	48284	82.19	2414
chr5A	48134	50555	chr4B	58936	56532	84.13	2439
chr5A	15463	17897	chr5A	7804	10241	98.2	2439
chr5A	108084	110523	chr4B	275121	277468	85.13	2448
chr5A	147760	150162	chr4B	89561	87116	85.26	2470
chr5A	139888	142330	chr5A	129742	127248	84.69	2502
chr4B	52542	55044	chr5A	142330	139888	84.21	2521
chr5A	77181	79680	chr5A	139888	142331	86.31	2521
chr5A	71076	73587	chr5A	139888	142349	83.85	2527
chr4B	181490	183994	chr5A	142334	139888	87.37	2533
chr4B	69801	72315	chr5A	142330	139888	85.02	2537
chr4B	73689	76224	chr5A	50675	48122	91.31	2554
chr4B	158094	160651	chr5A	50675	48112	81.79	2564
chr5A	131108	133658	chr5A	50675	48112	93.1	2564
chr4B	185373	187935	chr5A	50675	48112	93.8	2564
chr5A	48112	50675	chr4B	48255	50819	91.73	2565
chr5A	48112	50675	chr5A	119417	121985	93.85	2570
chr5A	48112	50696	chr5A	65257	67836	93	2585
chr4B	63515	66423	chr4B	74166	77078	81.97	2923
chr5A	131907	134893	chr5A	127247	124255	80.64	3012
chr5A	124255	127247	chr4B	189170	186172	80.74	3012
chr4B	74473	77469	chr5A	127247	124255	80.72	3013
chr5A	64021	67021	chr5A	124255	127247	80.82	3013
chr5A	124255	127247	chr4B	47021	50020	81.52	3014
chr5A	118181	121183	chr5A	124255	127247	80.27	3016
chr4B	186172	189170	chr5A	127247	124255	80.06	3024
chr4B	155781	158898	chr5A	139028	135938	89.27	3130
chr5A	14408	17575	chr4B	106594	103388	86.86	3234
chr5A	14408	17575	chr4B	128710	125508	86.65	3235
chr4B	3204	6436	chr4B	191762	195001	90.83	3260
chr4B	103354	106594	chr5A	17609	14408	86.57	3269
chr4B	125474	128710	chr5A	17609	14408	86.33	3270
chr4B	63251	66533	chr4B	50591	47303	81.66	3299
chr5A	131336	134619	chr4B	63251	66540	81.03	3306
chr5A	118462	121757	chr4B	66535	63251	80.83	3307
chr4B	90576	93866	chr4B	191773	195063	86.96	3321
chr4B	158893	162307	chr5A	127247	123832	91.11	3421
chr5A	136511	139893	chr4B	45882	42479	87.15	3440
chr5A	127240	130732	chr5A	73576	70081	94.64	3506
chr4B	52540	56040	chr5A	73570	70081	91.64	3517
chr5A	70081	73568	chr5A	76205	79679	87.82	3522
chr5A	70081	73570	chr4B	184994	181492	89.7	3523
chr4B	69801	73310	chr5A	73568	70081	87.83	3532
chr4B	63251	66811	chr4B	185601	189170	80.54	3582
chr4B	47021	50591	chr4B	66811	63251	81.5	3584
chr4B	63251	66825	chr5A	67590	64007	80.68	3598
chr4B	63251	66825	chr5A	121757	118167	80.41	3604
chr4B	84783	88388	chr4B	177871	181494	84.85	3650
chr5A	135938	139643	chr4B	158898	155157	86.41	3775
chr4B	350145	354005	chr4B	359145	363022	97.55	3878
chr5A	75820	79682	chr4B	185379	181491	89.11	3912
chr5A	39755	43610	chr4B	42003	45882	87.03	3918
chr5A	75821	79679	chr4B	56420	52542	83.87	3924
chr4B	69799	73695	chr5A	79681	75820	87.18	3924
chr5A	127226	131114	chr5A	79699	75820	87.05	3939
chr4B	101599	105536	chr4B	146095	150010	97.16	3945
chr5A	40231	44196	chr5A	139893	135923	92.86	3989
chr5A	123299	127247	chr4B	162870	158893	88.49	3996
chr4B	106578	110569	chr4B	116428	120435	97.93	4009
chr4B	157908	161900	chr5A	122174	118165	81.01	4024
chr5A	44178	48122	chr5A	127247	123233	90.24	4037
chr4B	116446	120557	chr4B	128712	132807	97.57	4121
chr4B	41710	45882	chr4B	154116	158325	89.72	4231
chr4B	106578	110569	chr4B	138548	142808	90.96	4261
chr5A	183049	187162	chr4B	370768	375013	88.47	4283
chr4B	128712	132807	chr4B	138566	142930	90.85	4371
chr5A	118165	122547	chr4B	161900	157529	80.37	4412
chr5A	43594	48123	chr4B	63240	67850	87.51	4636
chr4B	63146	67847	chr4B	158219	162943	90.08	4746
chr4B	225478	230372	chr4B	230730	235614	89.75	4917
chr4B	332431	337620	chr4B	337620	332431	91.62	5227
chr4B	47005	52345	chr4B	161900	156566	80.12	5388
chr5A	117818	123236	chr4B	46659	52073	92.39	5430
chr4B	71966	77832	chr4B	52541	46658	95.92	5887
chr4B	46659	52541	chr5A	135253	129394	92.73	5888
chr4B	183646	189534	chr4B	52541	46658	92.2	5894
chr4B	54695	60393	chr4B	52541	46659	81.8	5919
chr4B	46658	52597	chr4B	77832	71910	95.51	5944
chr5A	63658	69612	chr4B	46659	52607	92.08	5962
chr5A	129862	135938	chr5A	123236	117123	91.75	6142
chr4B	72435	78531	chr5A	123236	117123	90.09	6144
chr5A	62969	69077	chr5A	117112	123236	91.91	6154
chr5A	117123	123238	chr4B	61087	55162	80.18	6171
chr4B	184118	190451	chr5A	123236	117118	88.6	6371
chr4B	2	6450	chr4B	87336	93815	84.93	6524
chr4B	61088	67586	chr5A	129398	123487	80.06	6544
chr4B	324961	331741	chr4B	344961	338244	91.7	6818
chr5A	128854	135940	chr5A	70082	62978	94.72	7122
chr4B	54152	61087	chr5A	70087	62980	84.88	7162
chr5A	62979	70096	chr4B	78532	71405	89.19	7170
chr4B	183092	190446	chr5A	70096	62980	87.91	7387
chr5A	127224	135486	chr4B	181470	189762	90.57	8333
chr4B	52540	60650	chr4B	181492	189796	82.19	8373
chr4B	154407	162944	chr5A	39750	48121	86.53	8566
chr5A	127241	135939	chr4B	69794	78532	88.89	8786
chr5A	127247	135969	chr4B	52541	61118	85.31	8820
chr4B	69797	78541	chr4B	52538	61097	80.18	8850
chr4B	69803	78531	chr4B	181496	190446	86.91	9006
